# Supplementary material for: Hormonal Defects Are Common during Puumala Hantavirus Infection and Associate with Disease Severity and Biomarkers of Altered Haemostasis
Source: Viruses. 2021 Sep 13;13(9):1818. doi: 10.3390/v13091818 (PMC8472102; doi:10.3390/v13091818)
Supplement: Supplementary file 1 [file viruses-13-01818-s001.zip › Viruses_Supplementary data_orginal material S1.xlsx]

## Sheet: Viruses_data
Age	Sex	Smoking_status	BMI	Fever_days	Hospital_days	Syst_bp_minimum	Weight_change	Minimum_diuresis	Maximum_creatinine	Maximum_leukocyte_count	Maximum_hematocrit	Minimum_hematocrit	Mimimum_platelet_count	Maximum_CRP	D-dimer	F1+F2	MPV	IPF%	Trombopoietin	Testo	LH	PRL	TSH	fT4	TPOAb	ACTH	Cortisol	GH	IGF-1	IGF1_GH-ratio	Testo_at_control_visit	LH_at_control_visit	FSH_at_control_visit	Estradiol_at_control_visit	PRL_at_control_visit	TSH_at_control_visit	fT4_at_control_visit	TPOAb_at_control_visit	ACTH_at_control_visit	Cortisol_at_control_visit	GH_at_control_visit	IGF-1_at_control_visit	IGF1_GH_ratio_at_control_visit
45.1167	0	1	25.4		9	123	7	350	698	21	0.39	0.36	37	82.2	3.1	1203	12.3	12.8	299.3	5.3	3.5	384	7.2	6.4	10	64	538	0.77	9	11.74	11	3.5			98	2.5	13.7	9	13	198	0.2	20	100
50.8194	1	1	22.3	11	9	107	4.2	1300	285	12.3	0.48	0.29	27	78.9	4.5	1040	12.3	12.5	346.6			313	0.9	15.5	77	11	503	1.03	11	10.65			19.5	0.36	189	1.8	16.3	14	8.7	280	0.17	13	78
56.4806	0	1	26.4	5	4	126	1.2	1600	359	17.6	0.52	0.39	89	86.3	4.4	843	11.6	10.1	69.8	4.5	4.1	218	1.2	10	21	25	541	0.43	10	23.08	11	4.7			193	2.8	16.7	12	28	362	2.17	17	7.85
57.7944	0	2		7	4	108		500	296	5.1	0.37	0.36	141	22	1.2	289	9.4	2.4		8.9	4.4	252	3	14.4	12	14	236	0.73	23	31.36	14.1	7.2			160	2	12	13	9.5	213	0.03	17
51.9861	0	0	28.1	9	9	130	11.3	280	983	18.7	0.48	0.36	102	154.8	34	982	13.1	4.4	55.8	3.1	2.1	389	1.9	10.3	7	17	519	0.67	15	22.5	21.8	4.7			186	2.5	14.5	8	4	128	0.03	21	630
37.3361	0	1	21.2		22	60	9.4	300	463	38.6	0.59	0.25	25	69.7																	15.5	5.3			262	0.78	9.8	5	20	298	0.2	20	100
21.175	0	0		12	6	127	4.8	700	714	8.4	0.42	0.37	42	69	2.5	429	9.5	2	116	15.3	7.8	265	1.9	14.3	10	40	382	0.5	17	34
46.3028	0	0	36.8	12	10	97	3.8	300	109	10.7	0.45	0.38	34	243.9	3.3	704		15.1	257.8	1.3	2.4	437	4.1	12.5	13	28	655	0.1	13	130	6.7	4.3			165	4.4	14.1	21	22	365	0.03	17	566.67
63.3778	1	0	24.7	9	7	101	1	1920	71	4.2	0.4	0.36	49	142.1	0.8	329	10.4	2.5	246.6			565	3	16	4	5.6	215	1.03	14	13.55			49.4	0.02	208	2.1	16.8	8	24	248	8	30	3.75
39.1639	0	1	30.4	10	10	116	7.2	980	518	8.5	0.45	0.35	60	99.4	4.1	912	12.8	7.3	150.5	2	3.1	1003	3.2	17.5	4	31	611	0.97	13	13.45	10.5	5.5			156	1.3	15.8	13	8.3	272	0.1	24	240
29.0083	0	1		10	4	135	3.3	810	420	8.1	0.4	0.35	80	26.6	1.6	591	10.8	4.8		7.9	8.5	280	4.8	17.2	10	22	263	1.27	23	18.16
50.2806	1	2	28.2	9	5	104	1.3	1000	72	8	0.43	0.35	150	31.2	0.9	531	10.7	3.3	58.8			3415	4.1	16.7	8	8.4	316	0.17	13	78			6.4	0.52	190	2.6	13.3	7	14	269	2.2	37	16.82
67.2639	0	0	24	9	9	100	1.7	400	136	10.7	0.4	0.32	28	143.1	29.6	1160	10.4	5	212.4	4.6	3.9	179	4	14.2	6	37	607	2.57	8	3.12	14.6	4.4			168	5	14.7	13	15	204	0.2	20	100
30.4083	0	1	25.1	6	7	119	5.6	1050	422	10	0.42	0.36	37	66.6	8.5	1445	12.8	11.1	161.7	8.8	13.8	359	1.7	14.1	25	57	397	1.97	19	9.66	13.6	4.7			252	4.4	17.3	9	34	349	0.07	27	405
52.0194	1	2	26.7	11	6	94	1.3	620	93	19.8	0.42	0.3	41	64.7	4.3	1487	10.9	5.3				429	4.2	16.7	9	21	326	0.67	8	12			15.6	0.99	551	2.1	13.6	8	15	193	4.1	29	7.07
66.5222	0	0	24.5	10	5	124	1.2	800	93	10.5	0.48	0.4	21	185.4	1.3	413		13.2	150.3	1.7	2.1	411	2	11.4	9	27	655	1.2	2.9	2.42	19.7	7			352	6.2	16.4	11	37	371	0.03	13	433.33
61.7333	1	0	33.7	13	8	83	1.1	770	186	16.2	0.41	0.31	97	45.9	2.8	1008	10.8		128.4			428	7.1	11.6	108	10	358	0.3	10	33.33			26.3	0.07	268	6.3	13.6	103	13	250	0.43	30	69.23
64.5083	0	1		11	10	113		1720	175	12.2	0.39	0.31	123	41.7	0.6	295			137.1												6.7	2.5			146	2.2	13.3	12	11	329	2	18	9
67.2694	0	2	32.5		6	126	6.3	1120	138	9.7	0.41	0.38	65	67.4	1.4	419	11.9	8.2		5.5	5	269	7.6	17.1	16	13	304	0.1	9	90	7.1	3.1			344	6.1	14.2	9	34	280	0.27	20	75
27.3639	0	1	24.7	13	9	100	5.6	140	919	10.2	0.4	0.28	23	74.3	20.8	940	10.9	5.7	206.7	2.2	1.4	1061	7	7.1	16	17	537	3.53	21	5.94	13.3	3.5			198	3.3	16.4	13	17	426	0.17	35	210
32.6639	0	1	27.2	9	7	114	6	1600	223	18.2	0.6	0.37	30	90.7	1.1	463	11.4	10.2	120.3	0.2	0.4	542	2.4	11.6	22	13	180	0.7	13	18.57	10.9	3			168	2	18.3	13	21	303	0.07	28	420
25.1389	1	1	30.4	4	12	86	3.8	340	891	45	0.54	0.26	5	57.4	14.2	1875		23.8	1257.6			439	9.1	10.7	4	12	924	19.8	13	0.66			3.4	0.03	311	0.33	11	7	15	200	0.17	17	102
29.6583	1	2	24.1	9	6	108	1.7	1070	91	8.1	0.45	0.37	80	116.2	1.2	284	11.3	9.4	81.1			338	3.3	11.9	47	19	249	0.17	17	102			4.9	0.27	209	1.5	13.8	36	13	161	2.47	29	11.76
30.1056	1	1	23.6	6	3	80	0.7	1250	350	13.8	0.48	0.36	66	93.2	2.8	1015	11	5.3	234			348	2.1	12.8	24	17	304	0.3	10	33.33			4.2	1.08	262	1.6	16	19	20	481	2.8	28	10
67.2861	0	2	34.7	9	8	125	6.4	1200	274	10.4	0.43	0.35	66	106.6	1.4	552	12.6	13.2	236.1	2.7	10.6	527	1.7	12.8	26	15	382	1.17	7	6	13.7	14.2			392	1.6	11.8	16	40	392	0.43	17	39.23
42.95	0	1		5	4	107	2.3	2320	185	13.2	0.54	0.41	24	21	3.7	864	12.6	12.7	344.6	7.6	4	353	1.3	12.6	11	7.5	362	1.63	10	6.12	19.7	11.1			288	1.6	14.3	14	31	491	0.33	18	54
45.4222	1	1	30.3	9	7	122	4.75	600	268	16	0.47	0.35	110	34.7	0.8	394	10.8	6	120.1			744	1.5	11.2	20	14	585	2.83	11	3.88			5.9	0.2	329	1.5	14.5	18	16	224	1.97	23
28.2	0	1	32.6	8	6	98	5.8	150	455	11.6	0.48	0.4	42	143.2			11.9	4.5	73.5	3.8	3.1	321	2.1	12.7	43	25	541	1.4	16	34.29	15.9	3.9			186	0.53	19.8	50	46	554	0.11	33	300
61.1	0	2	23.1	5	13	114	3.2	20	756	14.8	0.56	0.3	17	203.6				13.6	647.9	6.9	18	1283	2.4	12.2	13	30	1454	21.5	9	0.42	13.5	6.3			151	2.4	12.2	12	19	276	1.86	19	10.22
28.2	0	1	27.4	16	12	60	10.6	540	641	39.1	0.66	0.27	4	44.8			10.9	11.4	638.1	2	3.6	413	0.57	4.8	11	48	751	4.6	16	3.48	26.7	6.1			112	2.3	17.3	11	24	195	0.8	24	30
33.1	1	2	27.1	7	4	113	2.2	330	298	12.1	0.52	0.34	50	50.3			9.9	1.8	336.1			488	4.3	15.3	13	24	564	0.37	17	45.95			4.8	0.02	266	2.8	13.4	15	16	552	5.86	25	4.27
28.1	0	1	21.2	7	7	110	6.8	900	348	14	0.47	0.35	38	54.5			10.5	4.4	647.7	3.5	2.6	322	2.2	15.7	8	10	335	1.59	16	10.06	24.1	6.4			126	0.83	14	8	21	303	0.05	23	460
56.7	1	2		5	3	136	0.25	1900	501	10.8	0.4	0.37	389	28.3								471	5.9	16.2	17	10	420	0.35	15	42.86			69.6	0.03	220	2.4	14.3	17	14	274	0.11	24	218.18
53.1	1	0	30.8	9	10	108	12.45	400	625	7.5	0.43	0.31	67	85.1								1677	3.9	16	18	26	515	1.58	9	5.7			57.2	0.02	535	2.8	17	20	15	295	5.46	30	5.49
63.7	0	1	24.5	11	7	130	5.7	2100	264	7.4	0.5	0.39	51	62.3						3.7	3.5	280	3.1	13.2	10	20	436	1.54	9	5.84	29.5	9.5			185	1.8	15.7	13	25	300	0.25	23	92
24.1	0	1	25.1	9	5	136	3.45	1900	207	6.5	0.41	0.37	28	16.1						12.2	5.6	625	2.3	13.9	13	22	325	1.82	13	7.14	12.3	10			533	2.2	16.7	12	25	438	1.61	28	17.39
40.1	1	1	22.1	7	5	126	1.4	300	532	10.5	0.38	0.36	118	25.6								2063	3.1	16.3	16	16	498	2.6	14	5.38			4.6	0.38	131	1.5	16.6	17	10	177	0.15	19	126.67
36	1	1	23.6	3	3	100	0.3		339	10.7	0.42	0.37	23	41.5								449	1.51	8	10	10	470	0.66	6	9.09			4.2	0.27	281	2.14	15.6	17	11	502	3.6	18	5
62	0	0	26	4	4	154	0.8	1500	736	10	0.43	0.35	68	54						16	3.8	586	3.13	10.2	18	33	446	0.35	29	82.86	7.8	4.8			201	3.29	17.6	15	72	451	0.43	26	60.47
35	0	1		9	2	105		2050	106	10.1	0.51	0.43	50	98						17	5.9	109	3.35	9.6	10	12	390	0.79	9	11.39	13	3.7			167	3.73	19.3	12	14	324	0.15	25	166.67
44	0	1			2	107			122	6.2	0.43	0.41	54	68.9						18	3	271	1.53	14.9	13	14	477	0.82	15	18.29	28	3.6			214	1.46	18.8	13	15	298	0.26	23	88.46
57	1	0	39	14	6	139	2.5	5100	214	7.7	0.47	0.39	149	23.9								494	3.23	13.8	16	23	348	0.76	9	11.84			35.2	0.09	362	2.66	15.2	18	21	409	1.2	23	19.17
